# Supplementary material
Source: HighWire-hosted journal article supplement (https://bmjopen.bmj.com/content/12/1/e049055)
Supplement: inline-supplementary-material-1 [file inline-supplementary-material-1.pdf]

## Supplemental material

### The prognostic impact of depressive symptoms on all-cause mortality in individuals with abdominal aortic aneurysm and in the general population. A population-based prospective HUNT Study in Norway

Linn Å. Nyrønning<sup>1,2</sup> Rebecka Hultgren<sup>3,4</sup> Grethe Albrechtsen<sup>5,6</sup>, Erney Mattsson<sup>1,2</sup>  
Malin Stenman<sup>3,7</sup>

<sup>1</sup>Department of Surgery, Vascular Surgery, St Olavs Hospital, Trondheim, Norway,

<sup>2</sup>Department of Circulation and Medical Imaging, NTNU, Trondheim, Norway,

<sup>3</sup>Department of Molecular Medicine and Surgery, Karolinska Institutet, Stockholm, Sweden,

<sup>4</sup>Department of Vascular Surgery, Karolinska University Hospital, Stockholm, Sweden,

<sup>5</sup>Department of Public Health and Nursing, NTNU, Trondheim, Norway,

<sup>6</sup>Department of clinical and molecular medicine, NTNU, Trondheim, Norway,

<sup>7</sup>Perioperative Medicine and Intensive Care Function, Karolinska University Hospital, Stockholm, Sweden

Corresponding author:

**Malin Stenman**

Perioperative Medicine and Intensive Care Function

Karolinska University Hospital / Karolinska Institutet

SE-171 76 Stockholm, Sweden

E-mail: [Malin.Stenman@ki.se](mailto:Malin.Stenman@ki.se)

**Figure S1. “Log - log plot” to test the proportional hazards assumption. If the plotted lines are reasonably parallel, the proportional hazards assumption has not been violated.**
